# Supplementary material for: Rectal Application of a Highly Osmolar Personal Lubricant in a Macaque Model Induces Acute Cytotoxicity but Does Not Increase Risk of SHIV Infection
Source: PLOS journal article supplement (doi:10.1371/journal.pone.0120021), 2015-04-08
Supplement: S6 (10.1371/journal.pone.0120021.s006) [file journal.pone.0120021.s006]

**S1 Table.** SHIV challenge design showing the animal IDs.

| ID            | set 1 (c) | set 2 (c) | set 3 (L) | set 4 (L) | set 5 (L) | set 6 (L) |
|---------------|-----------|-----------|-----------|-----------|-----------|-----------|
| <b>CY9813</b> | + (25000) |           |           |           |           |           |
| <b>72371</b>  | + (250)   |           |           |           |           |           |
| <b>82112</b>  | + (2500)  |           |           |           |           |           |
| <b>610214</b> | - (12.5)  |           | - (250)   | + (1250)  |           |           |
| <b>610268</b> | - (12.5)  |           | - (250)   | + (1250)  |           |           |
| <b>72187</b>  | - (250)   |           | - (1.25)  | - (1250)  | + (2500)  |           |
| <b>81451</b>  | - (250)   |           | - (1.25)  | + (250)   |           |           |
| <b>81427</b>  | - (2500)  |           | + (500)   |           |           |           |
| <b>90153</b>  | - (1250)  |           | - (50)    | - (500)   | - (1250)  | - (5000)  |
| <b>90398</b>  | - (1250)  |           | - (50)    | - (500)   | + (500)   |           |
| <b>609290</b> |           | + (5000)  |           |           |           |           |
| <b>609354</b> |           | + (5000)  |           |           |           |           |
| <b>603306</b> |           | + (2500)  |           |           |           |           |
| <b>609320</b> |           | + (2500)  |           |           |           |           |
| <b>604962</b> |           |           |           |           | - (5000)  |           |
| <b>607780</b> |           | - (250)   | - (1.25)  | - (2500)  | - (2500)  |           |
| <b>72203</b>  |           | - (1250)  |           |           | + (5000)  |           |
| <b>81951</b>  |           | - (1250)  |           | - (500)   | - (1250)  | - (2500)  |
| <b>81461</b>  |           | - (500)   | - (12.5)  | - (250)   | - (500)   | - (25000) |
| <b>81559</b>  |           | - (500)   | - (12.5)  | + (250)   |           |           |
| <b>70782</b>  |           |           |           |           |           | - (25000) |

Sets 1 and 2 were phosphate buffered saline (PBS)-treated controls (c); sets 3, 4, 5 and 6 were lubricant-treated (L); '+' = animal infected; '-' = animal not infected; historical controls are not shown here. The virus doses (in TCID<sub>50</sub>) are indicated in parenthesis next to every SHIV challenge. During the cytotoxicity testing phase of the study, animals 610214, 610268, and 607780 were PBS-treated, and animals CY9813, 609290, 609354, 603306, 609320, and 604962 were lubricant-treated.
